# Supplementary material for: Polymer–graphite composite: a versatile use and throw plastic chip electrode
Source: Royal Society of Chemistry journal article supplement (doi:10.1039/c4an01405g), 2014-01-01
Supplement: c4an01405g1.pdf [file c4an01405g1.pdf]

## Electronic Supplementary Information

# Polymer-graphite composite: A versatile use & throw plastic chip electrode

*Mosarrat Perween,<sup>a,b</sup> Dilip B. Parmar,<sup>b</sup> Gopala Ram Bhadu,<sup>b</sup> and Divesh N. Srivastava<sup>a,b\*</sup>*

a Academy of Scientific & Innovative Research, CSIR-CSMCRI, Gijubhai Badheka Marg, Bhavnagar -  
364002, India

b Analytical Discipline and Centralized Instrument Facility, CSIR - Central Salt & Marine Chemicals  
Research Institute, Gijubhai Badheka Marg, Bhavnagar - 364 002, India

Fax: +91-0278-2567562; Tel: +91-278-2567760; E-mail: [dnsrivastava@csmcri.org](mailto:dnsrivastava@csmcri.org)

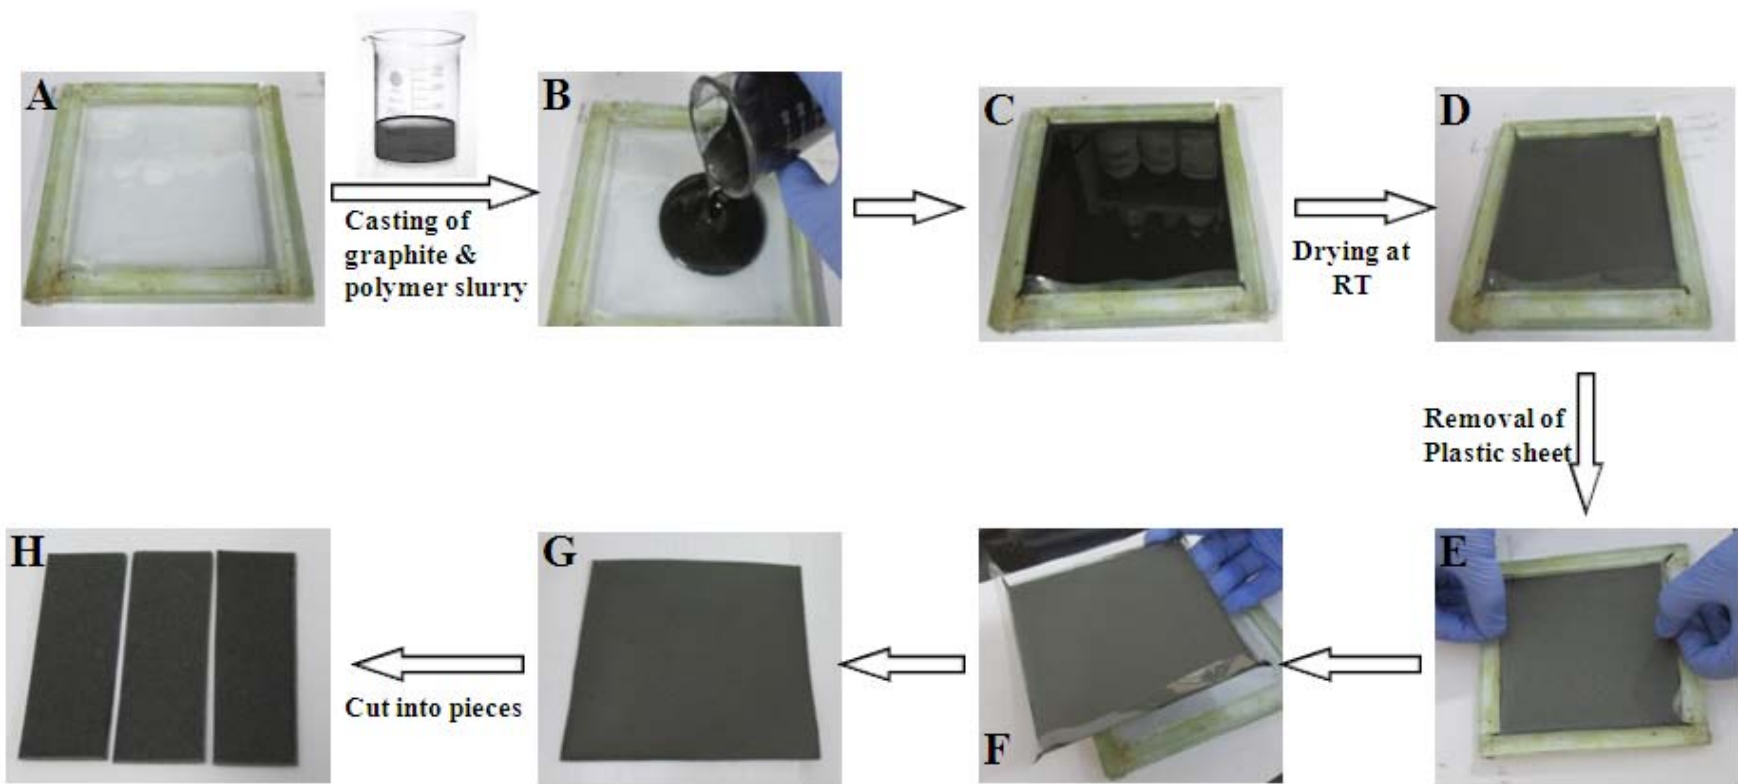

**Figure S-1:** Pictorial representation for making the plastic chip electrode.

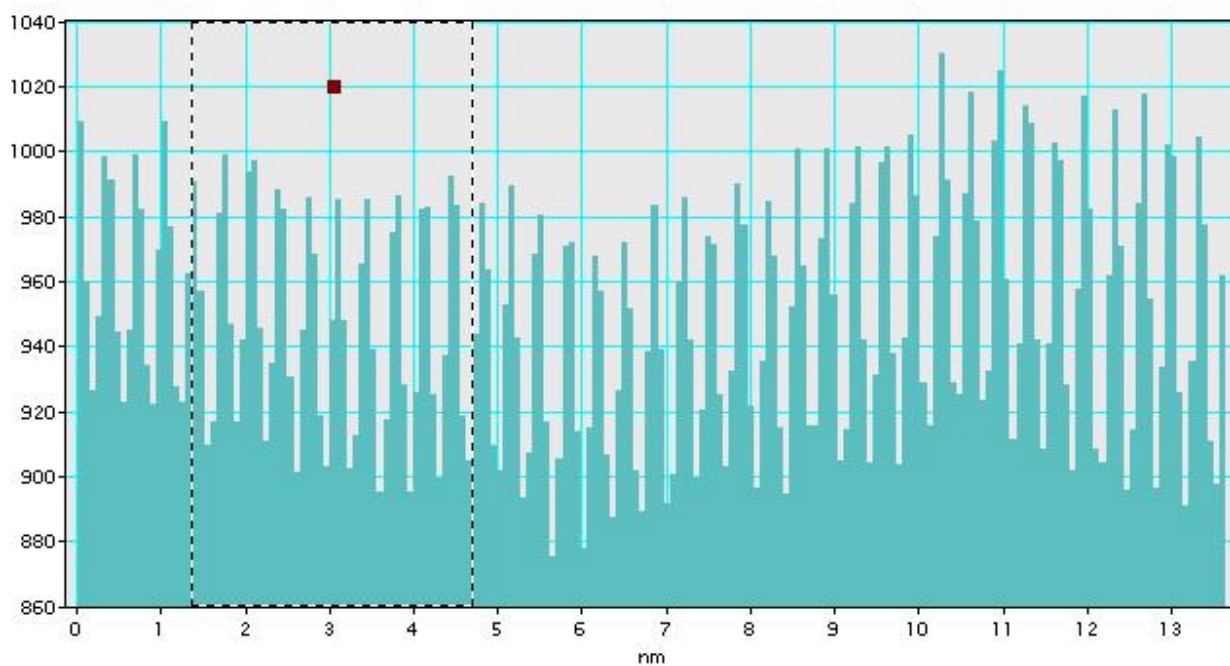

**FigureS-2:** Profilogram recorded from the graphene stacks by TEM.

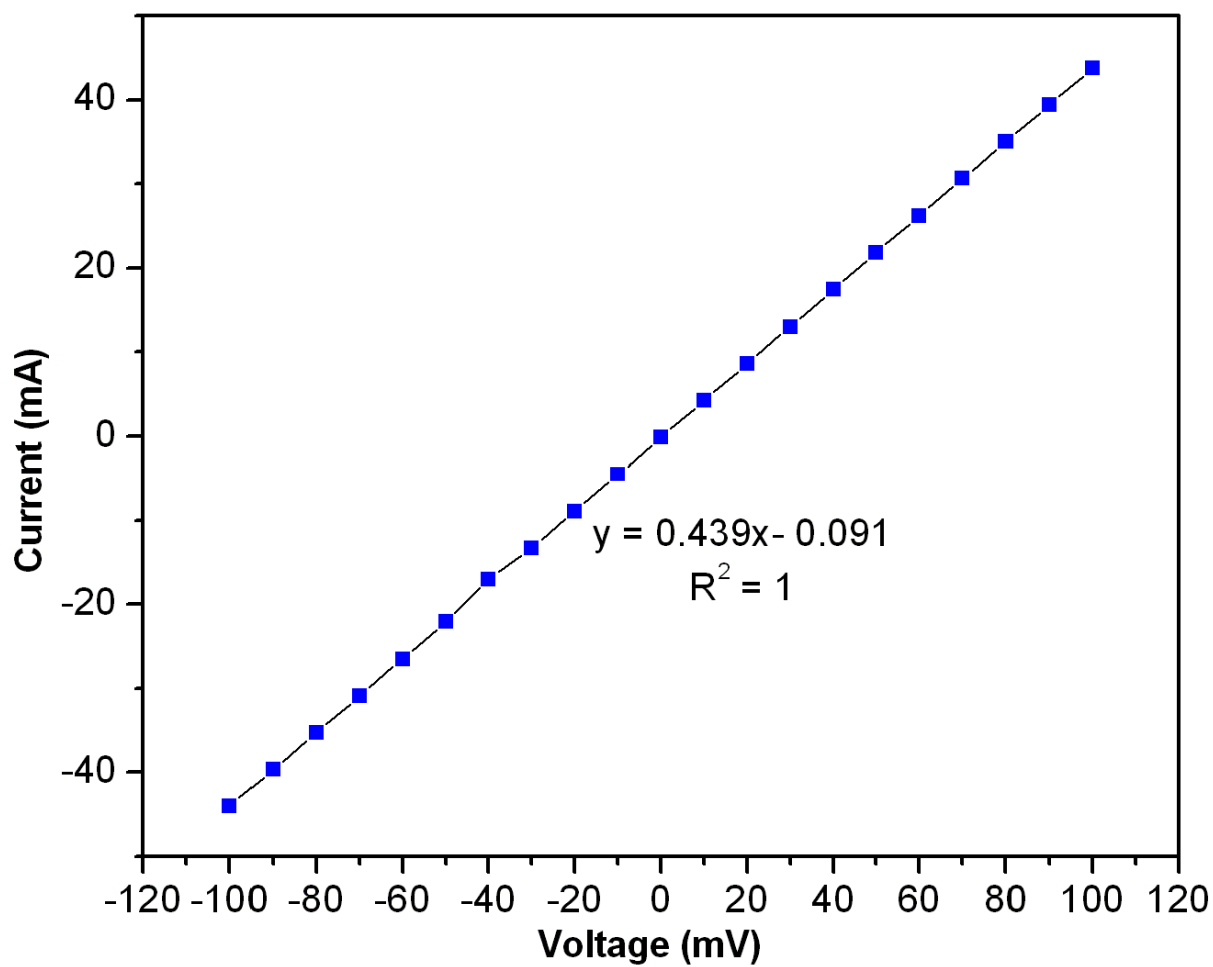

Figure S-3: I-V plot for plastic chip electrode.

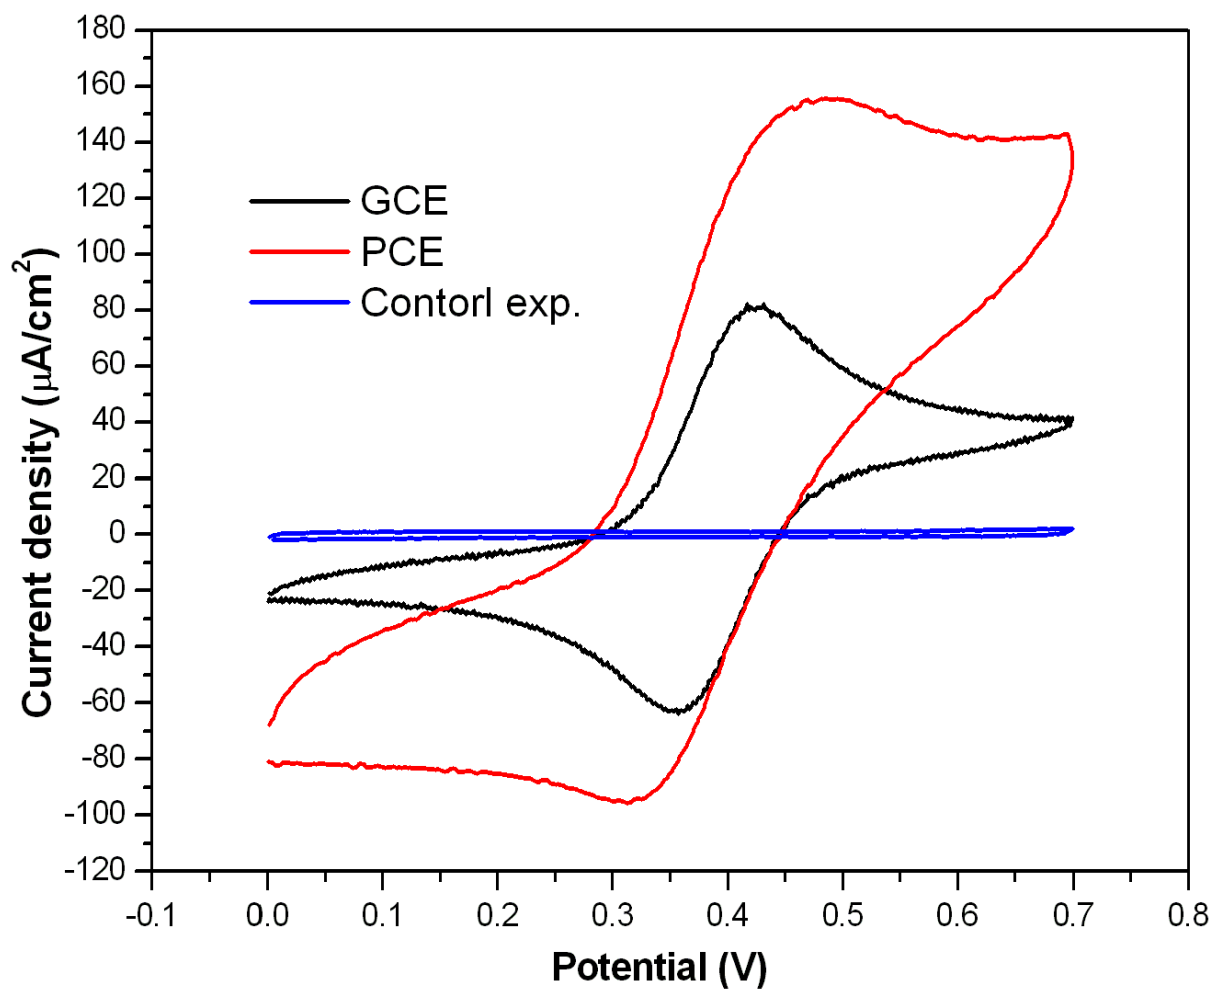

**Figure S-4:** Cyclic voltammogram of ferrocene/frocenium redox couple using plastic chip electrode (red curve) and glassy carbon electrode (black curve). Experimental condition: Working solution- 3mM ferrocene carboxylic acid in 0.1 M potassium nitrate, counter electrode- Pt, reference electrode- Ag/AgCl (sat KCl), scan rate- 100mV/s. The blue curve shows blank scan in supporting electrolyte without analyte using PCE.

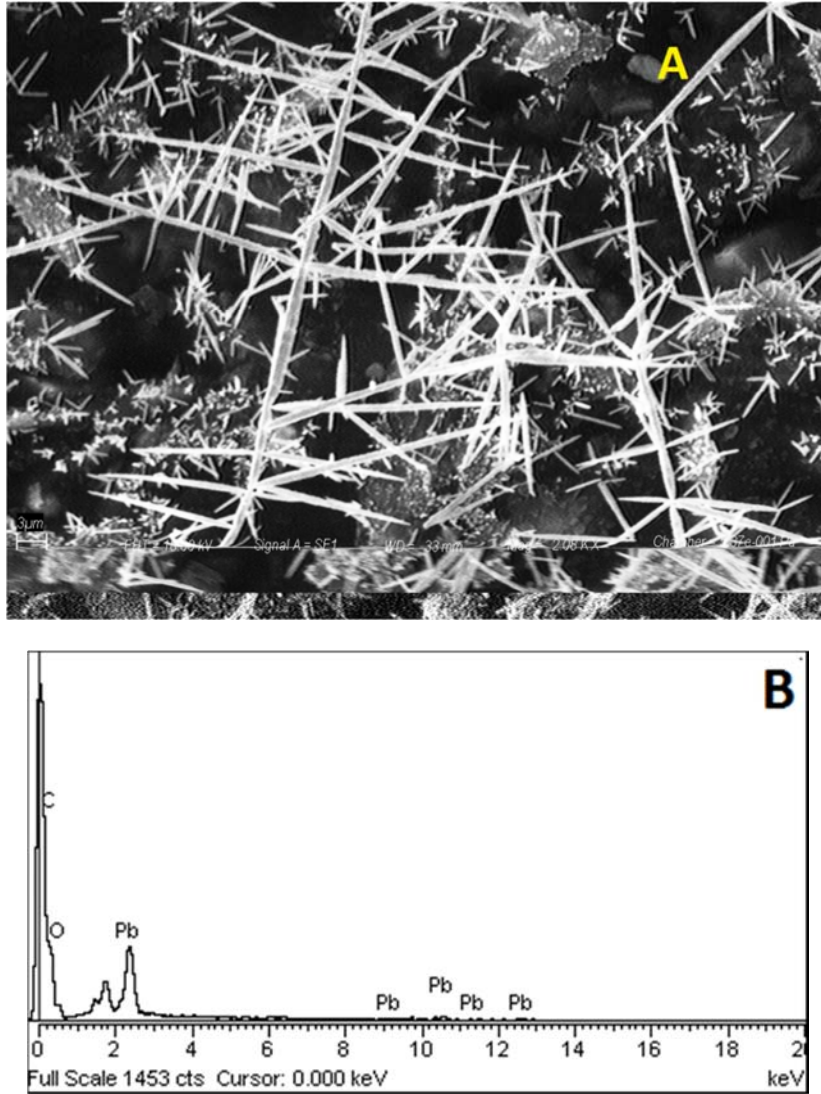

**Figure S-5:** (A) SEM image of plastic chip electrode after lead deposition; (B) EDX map of same showing presence of lead.

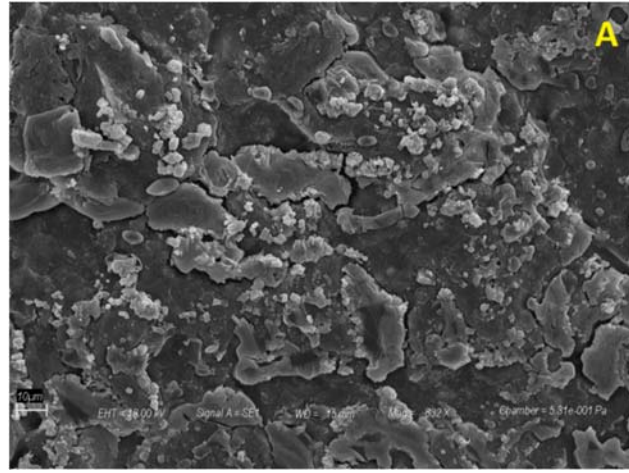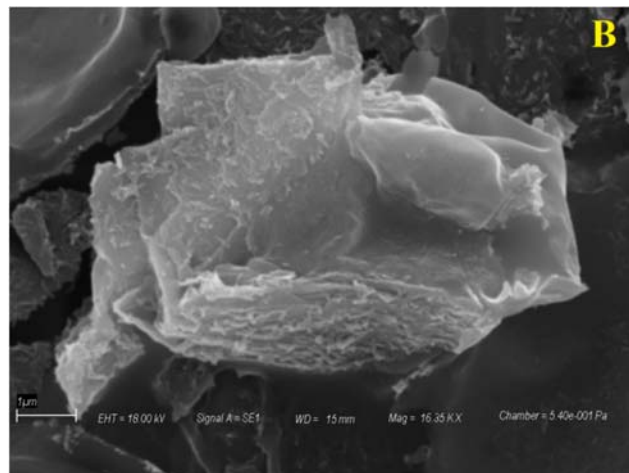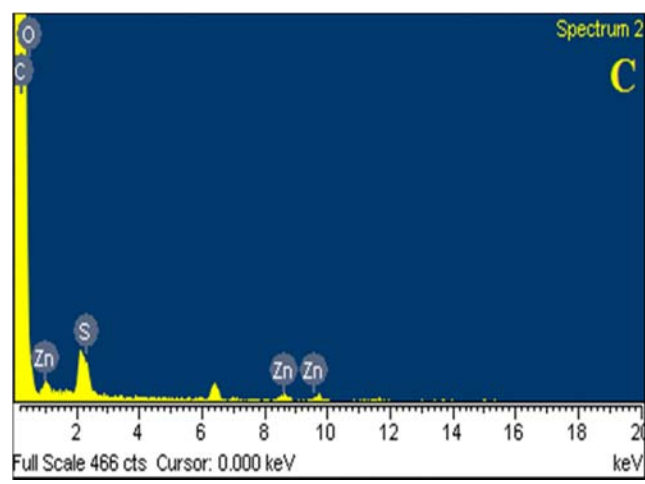

**Figure S-6:** SEM image of plastic chip electrode after zinc deposition. (A) Low resolution, (B) high resolution and (C) EDX spectra.

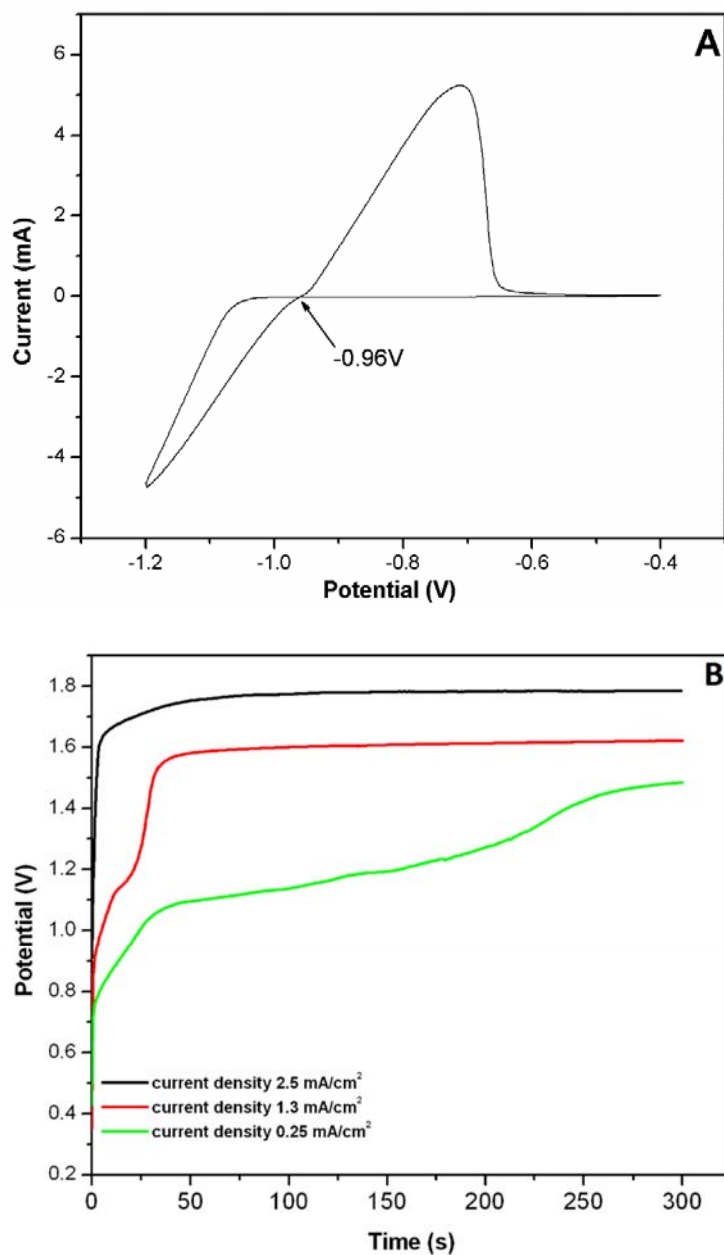

**Figure S-7:** Cyclic voltammogram of  $\text{Zn}^{+2}$  showing crossover potential (A) and chronopotentiometric curve for electrodeposition of zinc (B) on plastic chip electrode. Experimental condition: Working solution- kidd creek zinc electrolyte, Pt, reference electrode- Ag/AgCl (sat KCl), scan rate (for CV) - 100mV/s, current density (for electrodeposition) – 2.5, 1.3 & 0.5  $\text{mA}/\text{cm}^2$  (black, red and green respectively).



**Table T-1:** Physical properties of plastic chip electrode.

| <b>Parameters</b>                              | <b>Measurement technique</b> | <b>Value</b>   |
|------------------------------------------------|------------------------------|----------------|
| Young's Modulus ( $E_{\text{mod}}$ )<br>GPa    | Tensile test                 | $0.95 \pm 0.1$ |
| Tensile Strength ( $\sigma_{\text{ult}}$ ) MPa | Tensile test                 | 20.5           |
| Tensile Strain ( $\epsilon^u$ ) %              | Tensile test                 | 4.1            |
| On set temperature ( $^{\circ}\text{C}$ )      | TGA                          | 346.2          |
| Residual mass ( $M_{\text{res}}$ ) %           | TGA                          | 56.99          |
| Conductivity (mS/cm)                           | I-V measurement              | 19.75          |
| Average roughness (nm)                         | AFM                          | 4.775          |
| Area peak-to-valley height<br>(nm)             | AFM                          | 50.216         |

**Table T-2:** The redox parameters derived from the cyclic voltammogram of ferrocyanide/fericyanide;  $[\text{Ru}(\text{bpy})_3]^{+2}/[\text{Ru}(\text{bpy})_3]^{+3}$  and ferrocene/ frocenium redox couples.

| Scan rate | $[\text{Fe}(\text{CN})_6]^{+2/+3}$ |            |                 |                 | $[\text{Ru}(\text{bpy})_3]^{+2/+3}$ |            |                 |                 | ferrocene/ frocenium |            |                 |                 |
|-----------|------------------------------------|------------|-----------------|-----------------|-------------------------------------|------------|-----------------|-----------------|----------------------|------------|-----------------|-----------------|
|           | $E^0$                              | $\Delta E$ | $I_{\text{pa}}$ | $I_{\text{pc}}$ | $E^0$                               | $\Delta E$ | $I_{\text{pa}}$ | $I_{\text{pc}}$ | $E^0$                | $\Delta E$ | $I_{\text{pa}}$ | $I_{\text{pc}}$ |
| 5         | 0.270                              | 0.092      | 147.10          | -19.6           | 1.138                               | 0.096      | 56.40           | -12.11          | 0.375                | 0.110      | 52.41           | -18.86          |
| 10        | 0.270                              | 0.100      | 172.09          | -53.2           | 1.140                               | 0.100      | 70.40           | -24.00          | 0.375                | 0.113      | 61.21           | -28.60          |
| 25        | 0.275                              | 0.110      | 233.52          | -106.0          | 1.142                               | 0.109      | 89.06           | -38.37          | 0.382                | 0.115      | 77.54           | -42.42          |
| 30        | -                                  | -          | -               | -               | 1.140                               | 0.012      | 93.89           | -42.46          | -                    | -          | -               | -               |
| 50        | 0.273                              | 0.126      | 294.55          | -153.5          | -                                   | -          | -               | -               | -                    | -          | -               | -               |
| 75        | 0.271                              | 0.141      | 325.30          | -189.6          | 1.141                               | 0.129      | 123.14          | -66.42          | 0.389                | 0.122      | 111.45          | -66.30          |
| 100       | 0.273                              | 0.147      | 369.51          | -217.0          | 1.143                               | 0.133      | 137.87          | -71.21          | 0.394                | 0.128      | 124.33          | -74.45          |
| 150       | 0.273                              | 0.154      | 419.89          | -264.5          | 1.144                               | 0.140      | 158.99          | -81.15          | 0.408                | 0.144      | 154.80          | -97.38          |
| 200       | 0.278                              | 0.164      | 483.80          | -292.4          | 1.145                               | 0.142      | 175.86          | -90.92          | -                    | -          | -               | -               |
| 300       | 0.279                              | 0.169      | 553.42          | -353.4          | -                                   | -          | -               | -               | 0.407                | 0.154      | 217.60          | -146.40         |
| 500       | -                                  | -          | -               | -               | -                                   | -          | -               | -               | 0.418                | 0.168      | 281.90          | -202.30         |
